# Supplementary material
Source: publisher figshare collection journal article supplement (https://rs.figshare.com/ndownloader/files/25892644)
Supplement: Supplementary file [file 25892644]

## Supporting Figure

Sonja Lehtinen, Peter Ashcroft & Sebastian Bonhoeffer

On the relationship between serial interval, infectiousness profile and generation time

*Journal of the Royal Society Interface*

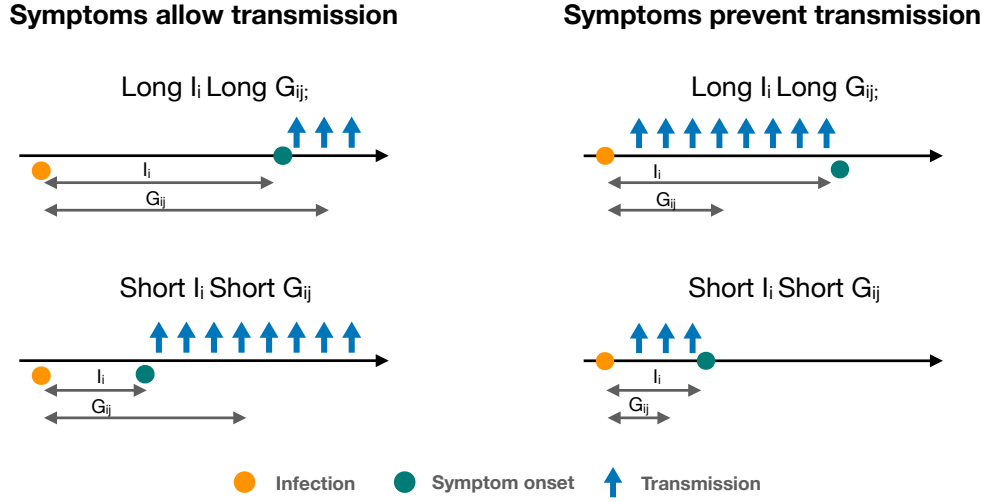

Figure 1: Schematic illustrating how symptom onset affecting transmission leads to a positive correlation between incubation period and generation time, whether symptoms increase or decrease transmission. In the left-hand panels, transmission only occurs after symptom onset. In the right-hand panels, transmission only occurs prior to symptom onset. We make the additional assumption that the length of the incubation period does not affect when infectiousness ends (for the left-hand panels) or starts (for the right-hand panel).
